# Supplementary material for: The Clinical Utility of Circulating Epstein-Barr Virus DNA Concentrations in NK/T-Cell Lymphoma: A Meta-Analysis
Source: Hindawi journal article supplement (doi:10.1155/2018/1961058), 2018-11-18
Supplement: f1 [file 1961058.f1.pdf]

**Figure S1** Forest plot of the analysis for pre-DNA associated PFS

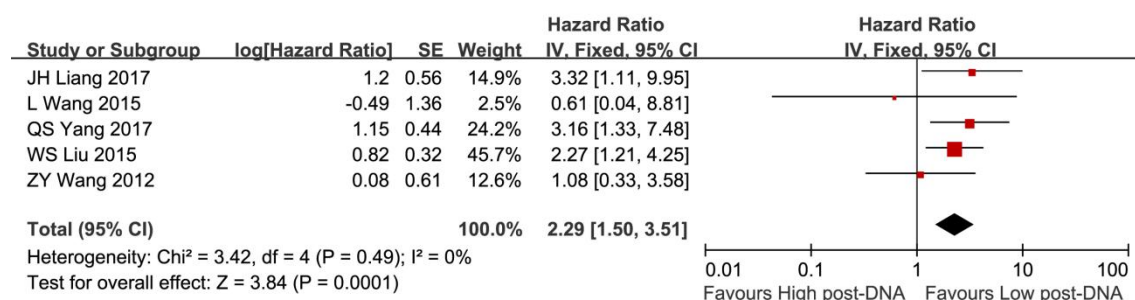

**Figure S2** Forest plot of the analysis for pre-DNA associated CR

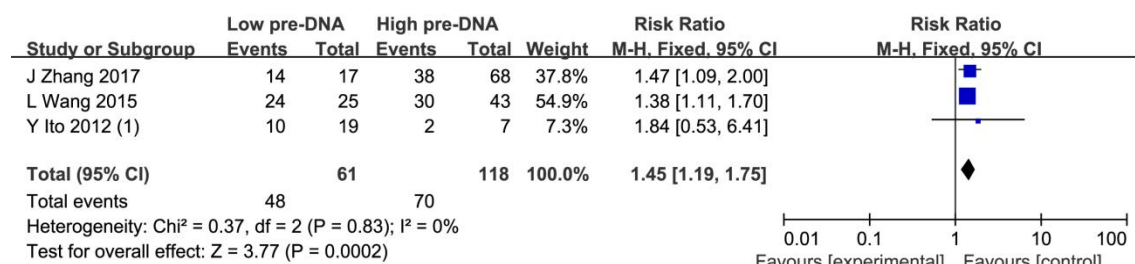

**Figure S3** Forest plot of the analysis for pre-DNA associated ORR

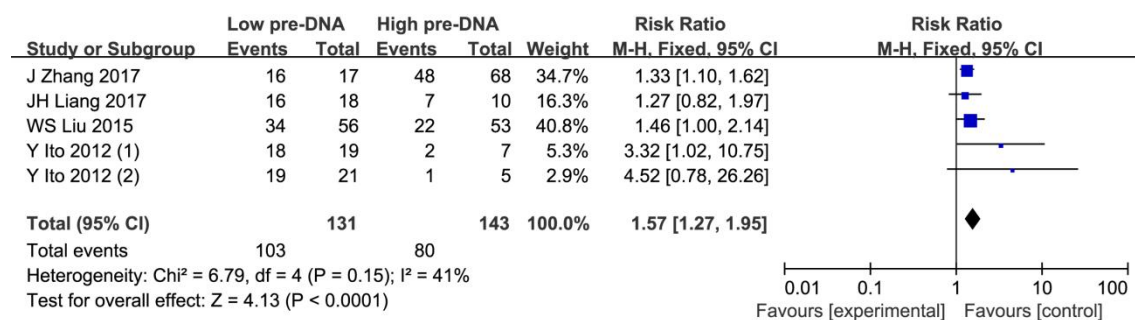

**Figure S4** Forest plot of the analysis for post-DNA associated PFS

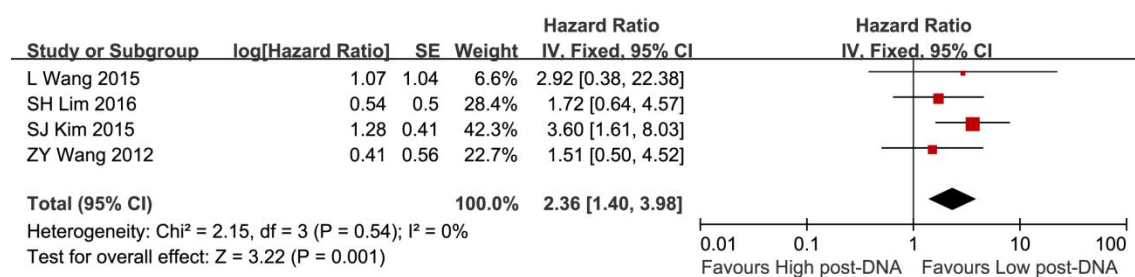

**Figure S5 Sensitivity Analysis**

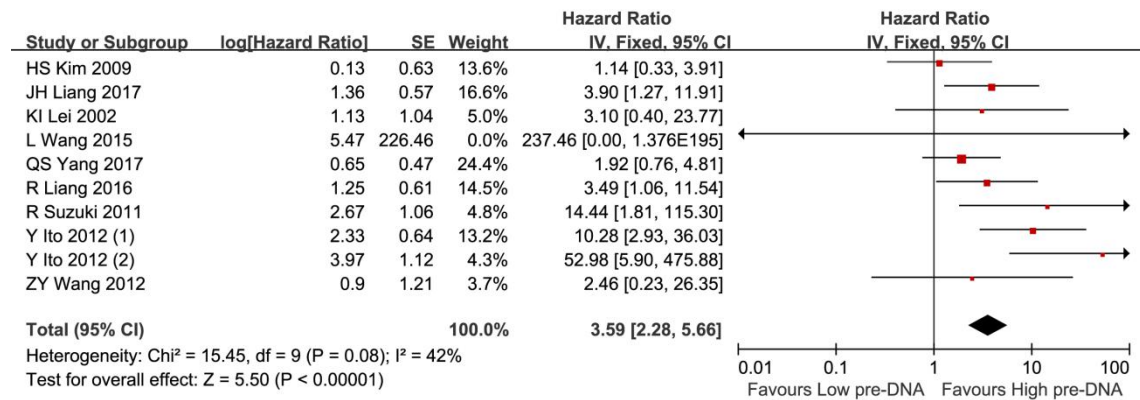

**Figure S6 Begg's test of publication bias**

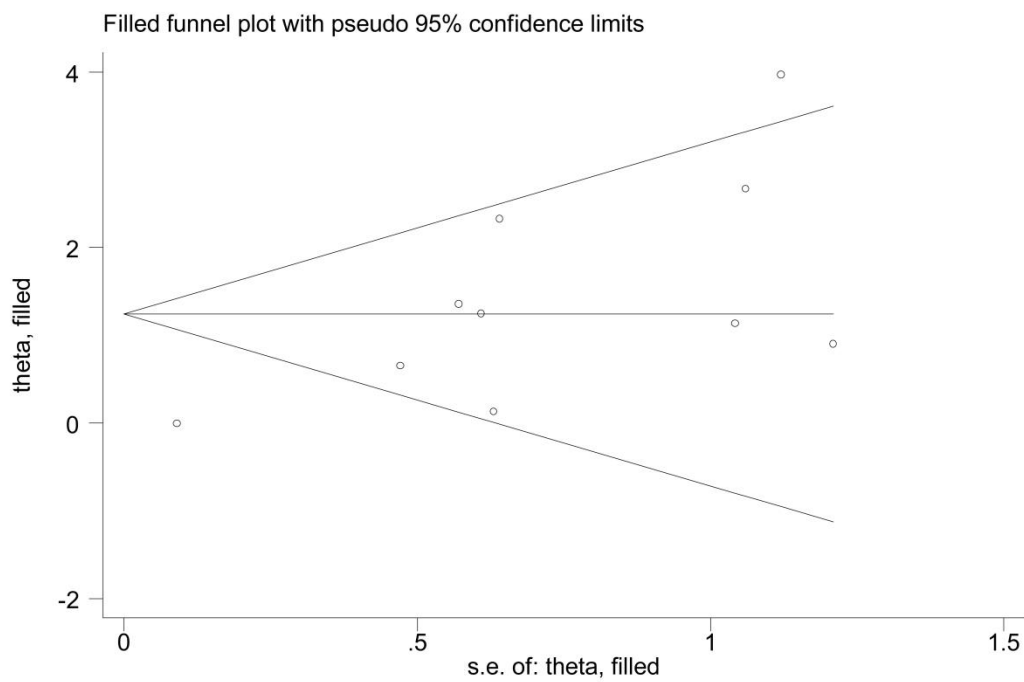

**Supplementary Table 1.** Results of subgroup analyses for pre-DNA associated OS

| Stratified Analysis                        | No. of studies | No. of pts | HR (95% CI)        | <i>P</i> -value <sup>a</sup> | Heterogeneity <i>I</i> <sup>2</sup> | <i>P</i> -value <sup>a</sup> |
|--------------------------------------------|----------------|------------|--------------------|------------------------------|-------------------------------------|------------------------------|
| <b>Number of Participants</b>              |                |            |                    |                              |                                     |                              |
| ≥50                                        | 4              | 303        | 1.02 [0.86, 1.21]  | 0.84                         | 0                                   | 0.49                         |
| <50                                        | 7              | 202        | 5.18 [2.28, 11.78] | <b>&lt;0.0001</b>            | 53                                  | <b>0.05</b>                  |
| <b>Sample of Quantification of EBV-DNA</b> |                |            |                    |                              |                                     |                              |
| plasma                                     | 8              | 400        | 3.06 [1.30, 7.16]  | <b>0.01</b>                  | 73                                  | <b>0.0005</b>                |
| whole blood                                | 3              | 105        | 4.95 [0.84, 29.07] | 0.08                         | 78                                  | <b>0.01</b>                  |
| <b>Ann Arbor stage</b>                     |                |            |                    |                              |                                     |                              |
| I-II                                       | 2              | 137        | 2.46 [0.23, 26.35] | 0.46                         | 0                                   | 0.98                         |
| III-IV                                     | 1              | 32         | 3.90 [1.27, 11.91] | <b>0.02</b>                  | NA                                  | NA                           |
| I-IV                                       | 6              | 284        | 1.93 [0.98, 3.81]  | 0.06                         | 62                                  | <b>0.02</b>                  |
| <b>Cut-off value</b>                       |                |            |                    |                              |                                     |                              |
| 0                                          | 2              | 153        | 0.99 [0.83, 1.18]  | 0.91                         | 0                                   | 0.98                         |
| 500                                        | 2              | 150        | 1.98 [0.84, 4.67]  | 0.12                         | 0                                   | 0.85                         |
| others                                     | 7              | 202        | 5.18 [2.28, 11.78] | <b>&lt;0.0001</b>            | 53                                  | <b>0.05</b>                  |

Abbreviations: No. : number; pts : patients; HR : hazard ratio; CI : confidence interval; NA : not applicable.

<sup>a</sup> Statistically significant results are shown in bold.

**Supplementary Table 2. Results of subgroup analyses for post-DNA associated OS**

| Stratified Analysis                        | No. of studies | No. of pts | HR (95% CI)       | <i>P</i> -value <sup>a</sup> | Heterogeneity <i>I</i> <sup>2</sup> | <i>P</i> -value <sup>a</sup> |
|--------------------------------------------|----------------|------------|-------------------|------------------------------|-------------------------------------|------------------------------|
| <b>Number of Participants</b>              |                |            |                   |                              |                                     |                              |
| ≥50                                        | 4              | 293        | 2.77 [1.36, 5.63] | <b>0.005</b>                 | 0                                   | 0.83                         |
| <50                                        | 1              | 27         | 1.67 [0.51, 5.40] | 0.40                         | NA                                  | NA                           |
| <b>Sample of Quantification of EBV-DNA</b> |                |            |                   |                              |                                     |                              |
| plasma                                     | 3              | 191        | 2.81 [0.92, 8.56] | 0.07                         | 0                                   | 0.65                         |
| whole blood                                | 2              | 129        | 2.27 [1.10, 4.69] | <b>0.03</b>                  | 0                                   | 0.51                         |
| <b>Ann Arbor stage</b>                     |                |            |                   |                              |                                     |                              |
| I-II                                       | 2              | 137        | 2.33 [0.62, 8.77] | 0.21                         | 0                                   | 0.43                         |
| I-IV                                       | 3              | 183        | 2.44 [1.23, 4.84] | <b>0.01</b>                  | 0                                   | 0.68                         |

Abbreviations: No. : number; pts : patients; HR : hazard ratio; CI : confidence interval; NA : not applicable.

<sup>a</sup> Statistically significant results are shown in bold.
